# Supplementary material for: Summary of best evidence on prevention of intracranial infection after endoscopic endonasal transsphenoidal pituitary neoplasm resection
Source: PubMed Central journal article supplement — Gland Surg. 2024 Oct 26;13(10):1759–69. doi: 10.21037/gs-24-415 (PMC11558293; doi:10.21037/gs-24-415), 2024-10-26
Supplement: gs-13-10-1759-supplementary.pdf [file gs-13-10-1759-supplementary.pdf]

- #1 Pituitary Neoplasms[Mesh]
- #2 Pituitary Tumor[Title/Abstract] OR Sellar region[Title/Abstract] OR Sellar region Tumor[Title/Abstract] OR Neoplasm, Pituitary[Title/Abstract] OR Neoplasms, Pituitary [Title/Abstract] OR Pituitary Neoplasm[Title/Abstract] OR Pituitary Tumors[Title/Abstract] OR Tumor, Pituitary[Title/Abstract] OR Tumors, Pituitary[Title/Abstract] OR Pituitary Adenoma[Title/Abstract] OR Adenoma, Pituitary[Title/Abstract] OR Adenomas, Pituitary[Title/Abstract] OR Pituitary Adenomas[Title/Abstract] OR Pituitary Carcinoma[Title/Abstract] OR Carcinoma, Pituitary[Title/Abstract] OR Carcinomas, Pituitary[Title/Abstract] OR Pituitary Carcinomas[Title/Abstract] OR Cancer of the Pituitary[Title/Abstract] OR Pituitary Cancer[Title/Abstract] OR Cancer, Pituitary[Title/Abstract] OR Cancers, Pituitary[Title/Abstract] OR Cancer of Pituitary[Title/Abstract] OR Pituitary Cancers[Title/Abstract]
- #3 #1 OR #2
- #4 transsphenoidal surgery[Title/Abstract] OR endoscopic transsphenoidal surgery[Title/Abstract] OR transsphenoidal[Title/Abstract] OR EETS[Title/Abstract]
- #5 Intracranial infection[Title/Abstract] OR Postoperatively[Title/Abstract] OR Postoperative intracranial infection[Title/Abstract] OR complication[Title/Abstract] OR neurosurgical central nervous system infections[Title/Abstract] OR NCNSIs[Title/Abstract] OR SSI[Title/Abstract] OR Perioperative infection[Title/Abstract] OR Surgical site infection[Title/Abstract]
- #6 management[Title/Abstract] OR system assessment[Title/Abstract] OR meta[Title/Abstract] OR guide[Title/Abstract] OR guideline[Title/Abstract] OR summary of evidence[Title/Abstract] OR syntheses[Title/Abstract]
- #7 #3 AND #4 AND #5 AND #6
